# Supplementary material for: Study on impurity removal from black powder of lithium iron phosphate cathode materials
Source: Royal Society of Chemistry journal article supplement (doi:10.1039/d5nj00201j), 2025-01-01
Supplement: d5nj00201j1.pdf [file d5nj00201j1.pdf]

## Supplementary Material

### Study on Impurity Removal from Black Powder of Lithium Iron Phosphate Cathode Materials

Yajie zhou <sup>a</sup>, Yuezhi Zhang <sup>a</sup>, Shuaiqi Gong <sup>a,b</sup>, Xin Zhao <sup>a</sup>, Yulin Min <sup>a,b</sup>, Penghui

Shi <sup>a,b,\*</sup>

<sup>a</sup> Shanghai Key Laboratory of Materials Protection and Advanced Materials in Electric Power, Shanghai University of Electric Power, Shanghai 200090, PR China

<sup>b</sup> Shanghai Institute of Pollution Control and Ecological Security, Shanghai 200090, PR China

\* Corresponding author. Tel.: +86 18801618059; E-mail addresses: shipenghui@shiep.edu.cn (P. Shi).

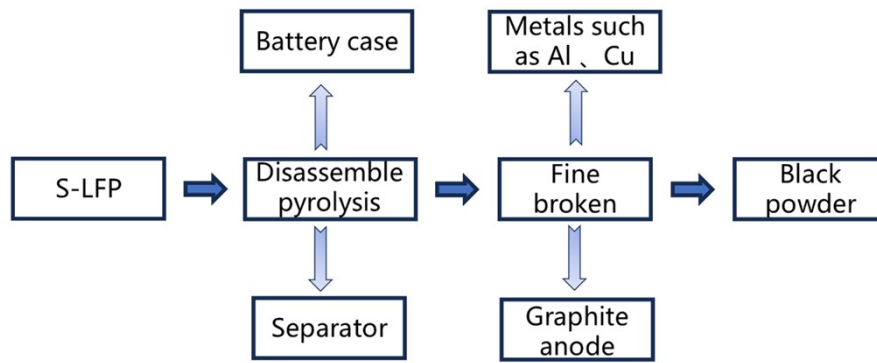

**Fig. S1. S-LFP preprocessing flowchart**

The preprocessing of spent batteries involves several steps, including discharge, disassembly, electrode sheet drying, and pulverization of the electrode sheets. To ensure safe disassembly, the battery must be discharged to a safe voltage level. A semi-automatic disassembly machine is used to separate the battery casing and the cell. Manual assistance is provided to mechanically separate the separator. The electrode sheets are then dried, and a pulverizer is used to obtain aluminum foil, copper foil, cathode lithium iron phosphate powder, and graphite powder.

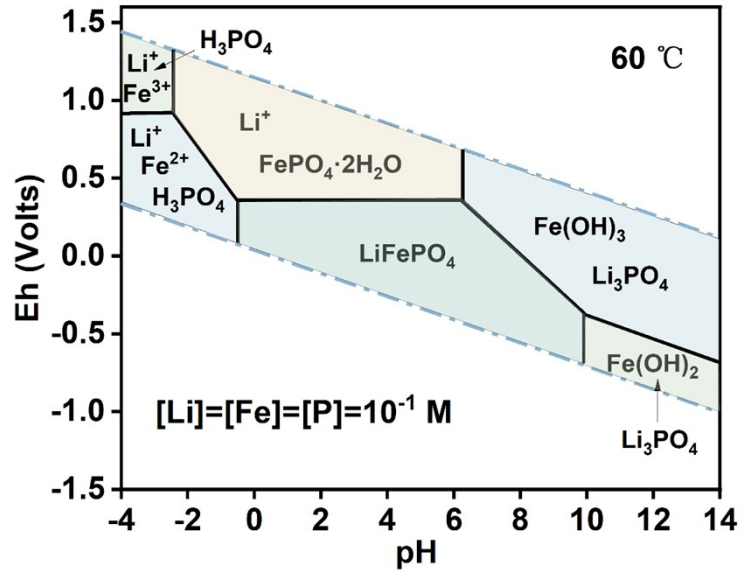

Fig. S2. E-pH plot of the Fe-P-S-H<sub>2</sub>O system at 60°C

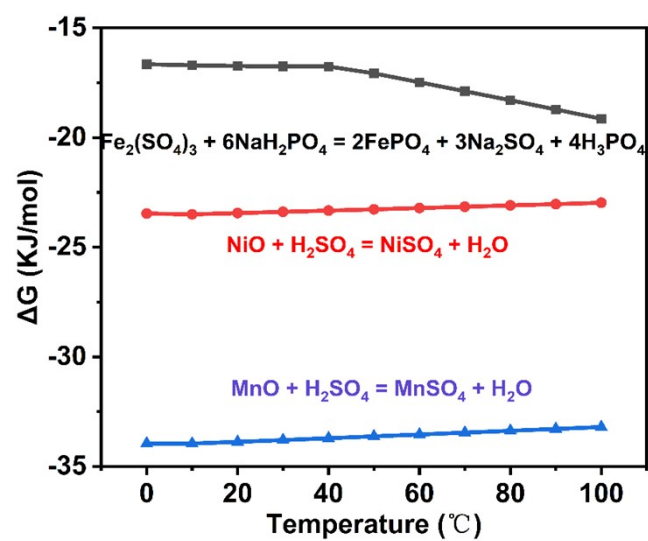

**Fig. S3.** Reaction (5) (6) (7) Gibbs free energy ( $\Delta G$ ) and temperature relationship

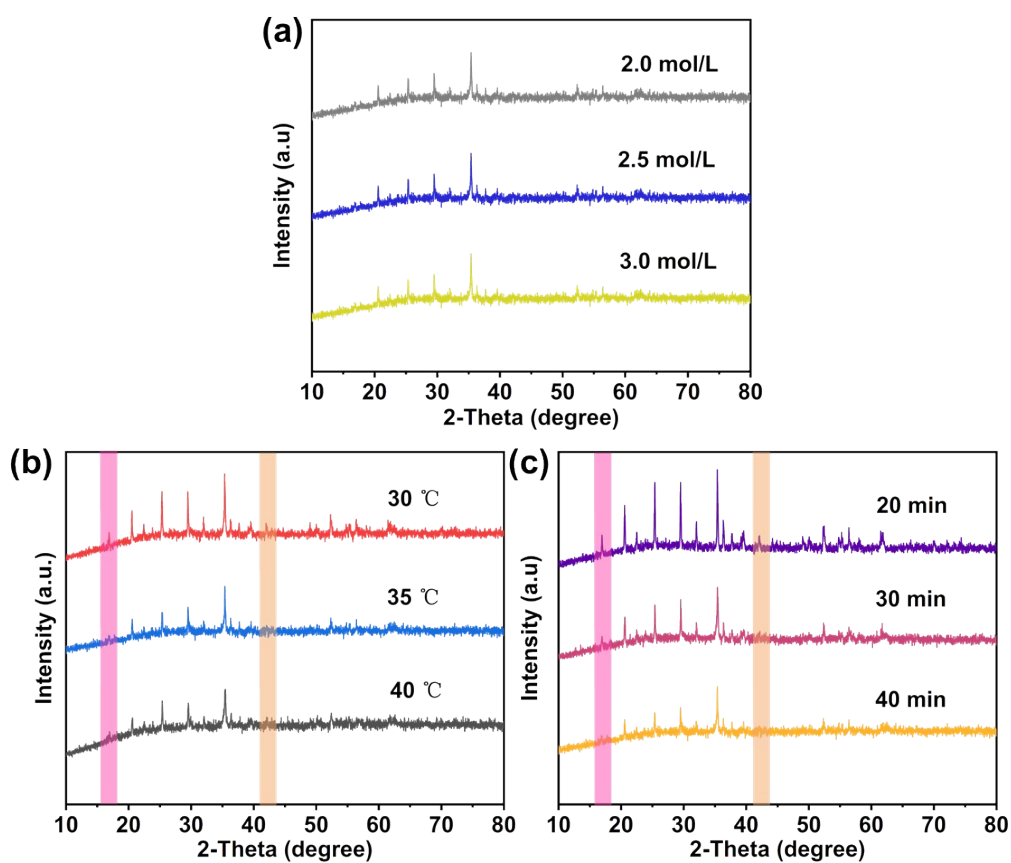

**Fig. S4.** XRD plots of S-LFP leaching under different conditions: (a) NaOH concentration, (b), leaching temperature, (c), leaching time

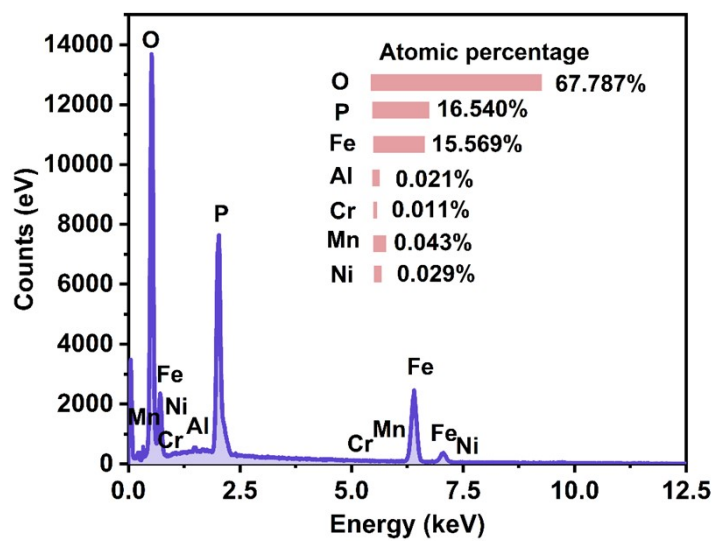

Fig. S5. EDS energy spectra after alkali immersion

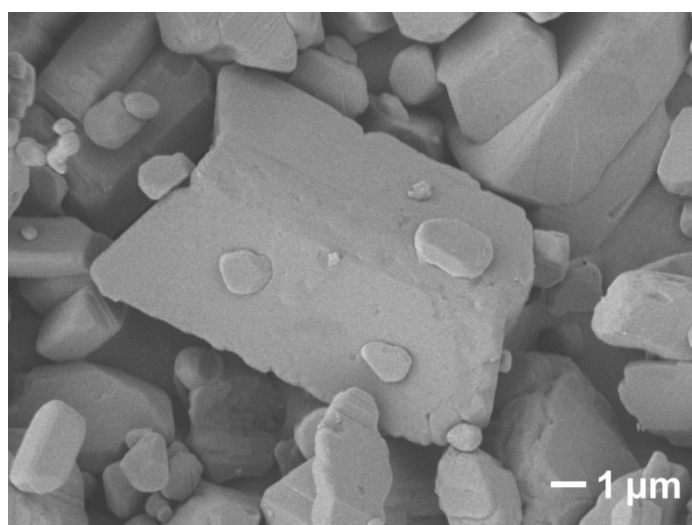

**Fig. S6.** SEM image of Li<sub>2</sub>CO<sub>3</sub> recycling

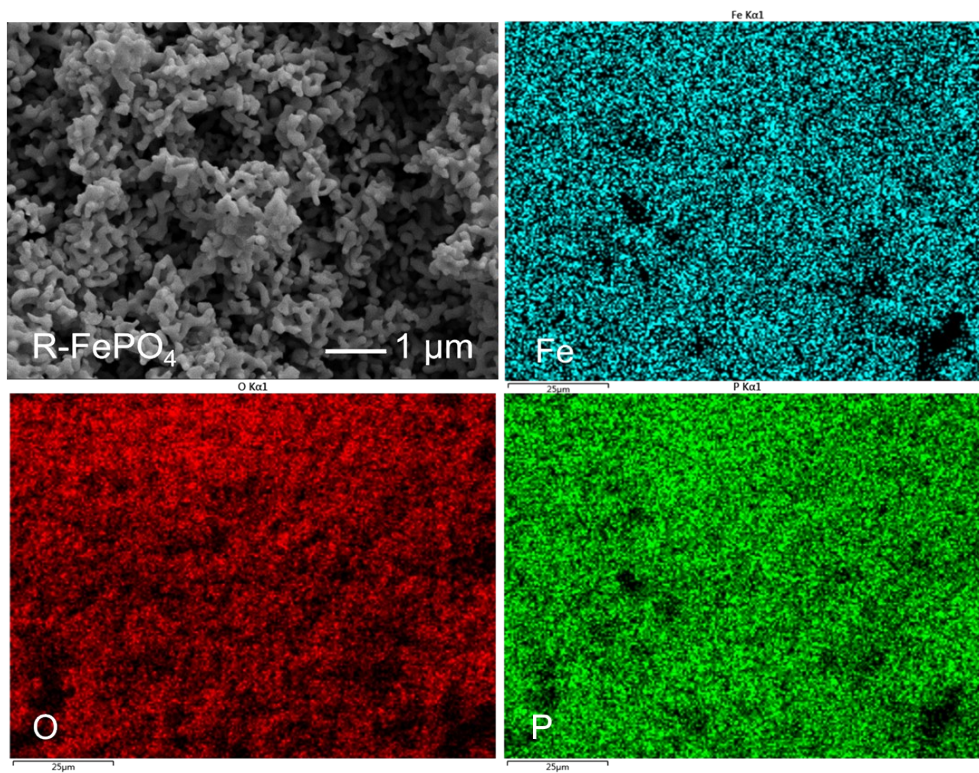

**Fig. S7.** SEM image and corresponding mapping image of FePO<sub>4</sub> recycling
